# Supplementary material for: Planning for Implementation: Shifting the Focus of National Biodiversity Strategies to Local Narratives, Existing Institutional Settings and Social Capital
Source: MDPI journal article supplement (doi:10.3390/su15129774), 2023-06-19
Supplement: s1 [file s1]

Archive with 1 entries (1 files):
- sustainability-2354476-supplementary.pdf
